# Supplementary material for: Broad blocking of MDR efflux pumps by acetylshikonin and acetoxyisovalerylshikonin to generate hypersensitive phenotype of malignant carcinoma cells
Source: PubMed Central journal article supplement (PMC5823906; doi:10.1038/s41598-018-21710-5), 2018-02-22
Supplement: 41598_2018_21710_MOESM1_ESM.pdf [file 41598_2018_21710_MOESM1_ESM.pdf]

**Broad blocking of MDR efflux pumps by acetylshikonin and  
acetoxyisovalerylshikonin to generate hypersensitive phenotype of  
malignant carcinoma cells**

Seyed Abbas Mirzaei <sup>1</sup>, Somayeh Reisi <sup>2</sup>, Parmida Ghiasi Tabari <sup>1</sup>, Abolfazl Shekari <sup>3</sup>,  
Fatemeh Aliakbari <sup>4</sup>, Elaheh Azadfallah <sup>4</sup>, and Fatemeh Elahian <sup>5,\*</sup>

<sup>1</sup> Cancer Research Center, Shahrekord format University of Medical Sciences,  
Shahrekord, Iran.

<sup>2</sup> Department of Genetics, Faculty of Basic Sciences, Shahrekord University,  
Shahrekord, Iran.

<sup>3</sup> Department of Genetics and Molecular Medicine, School of Medicine, Zanjan  
University of Medical Sciences, Iran.

<sup>4</sup> Department of Pharmaceutical Biotechnology, School of Pharmacy, Zanjan  
University of Medical Sciences, Iran.

<sup>5</sup> Cellular and Molecular Research Center, Basic Health Sciences Institute,  
Shahrekord University of Medical Sciences, Shahrekord, Iran.

\* Author for Correspondence:

F. Elahian

Cellular and Molecular Research Center, Basic Health Sciences Institute, Shahrekord  
University of Medical Sciences, Shahrekord, Iran.

Tel: (+98) 38 33331471, Fax: (+98) 38 33330709

E-mail: elahian@skums.ac.ir, [dr.elahian@yahoo.com](mailto:dr.elahian@yahoo.com)

**Scientific Reports  
Supplementary Dataset**

Supplementary Table S1. Primer designing and properties

| <b>No.</b> | <b>Gene name</b> | <b>Sense primer</b>                        | <b>Antisense primer</b>                   | <b>Annealing temperature</b> | <b>Gene accession number at NCBI</b> |
|------------|------------------|--------------------------------------------|-------------------------------------------|------------------------------|--------------------------------------|
| 1          | BCRP             | 5'-TAT CAA TGG GAT CAT GAA<br>ACC TGG-3'   | 5'-GCG GTG CTC CAT TTA TCA<br>GAA C-3'    | 62 °C                        | NM_004827.2                          |
| 2          | MDR1             | 5'-CAG CTA TTC GAA GAG TGG<br>GC-3'        | 5'-CCT GAC TCA CCA CAC CAA<br>TG-3'       | 56 °C                        | NM_000927.4                          |
| 3          | MRP1             | 5' -AGA GAC AGC TCA GCA GCT<br>CCT-3'      | 5' -GCC TTG TCA GCC TCC ATC<br>AG-3'      | 59 °C                        | NM_004996.3                          |
| 4          | MRP2             | 5'-CTA CTC CAT CAA TGA TAA<br>TCT GAC C-3' | 5'-AGG ATG ACA TCA GAA ATA<br>GAG ACC-3'  | 59 °C                        | NM_000392.3                          |
| 5          | $\beta$ -actin   | 5'-TCA TGA AGT GTG ACG TGG<br>ACA TC- 3'   | 5'-CAG GAG GAG CAA TGA TCT<br>TGA TCT- 3' | 59 °C                        | NM_001101.3                          |

Scientific Reports  
Supplementary Dataset

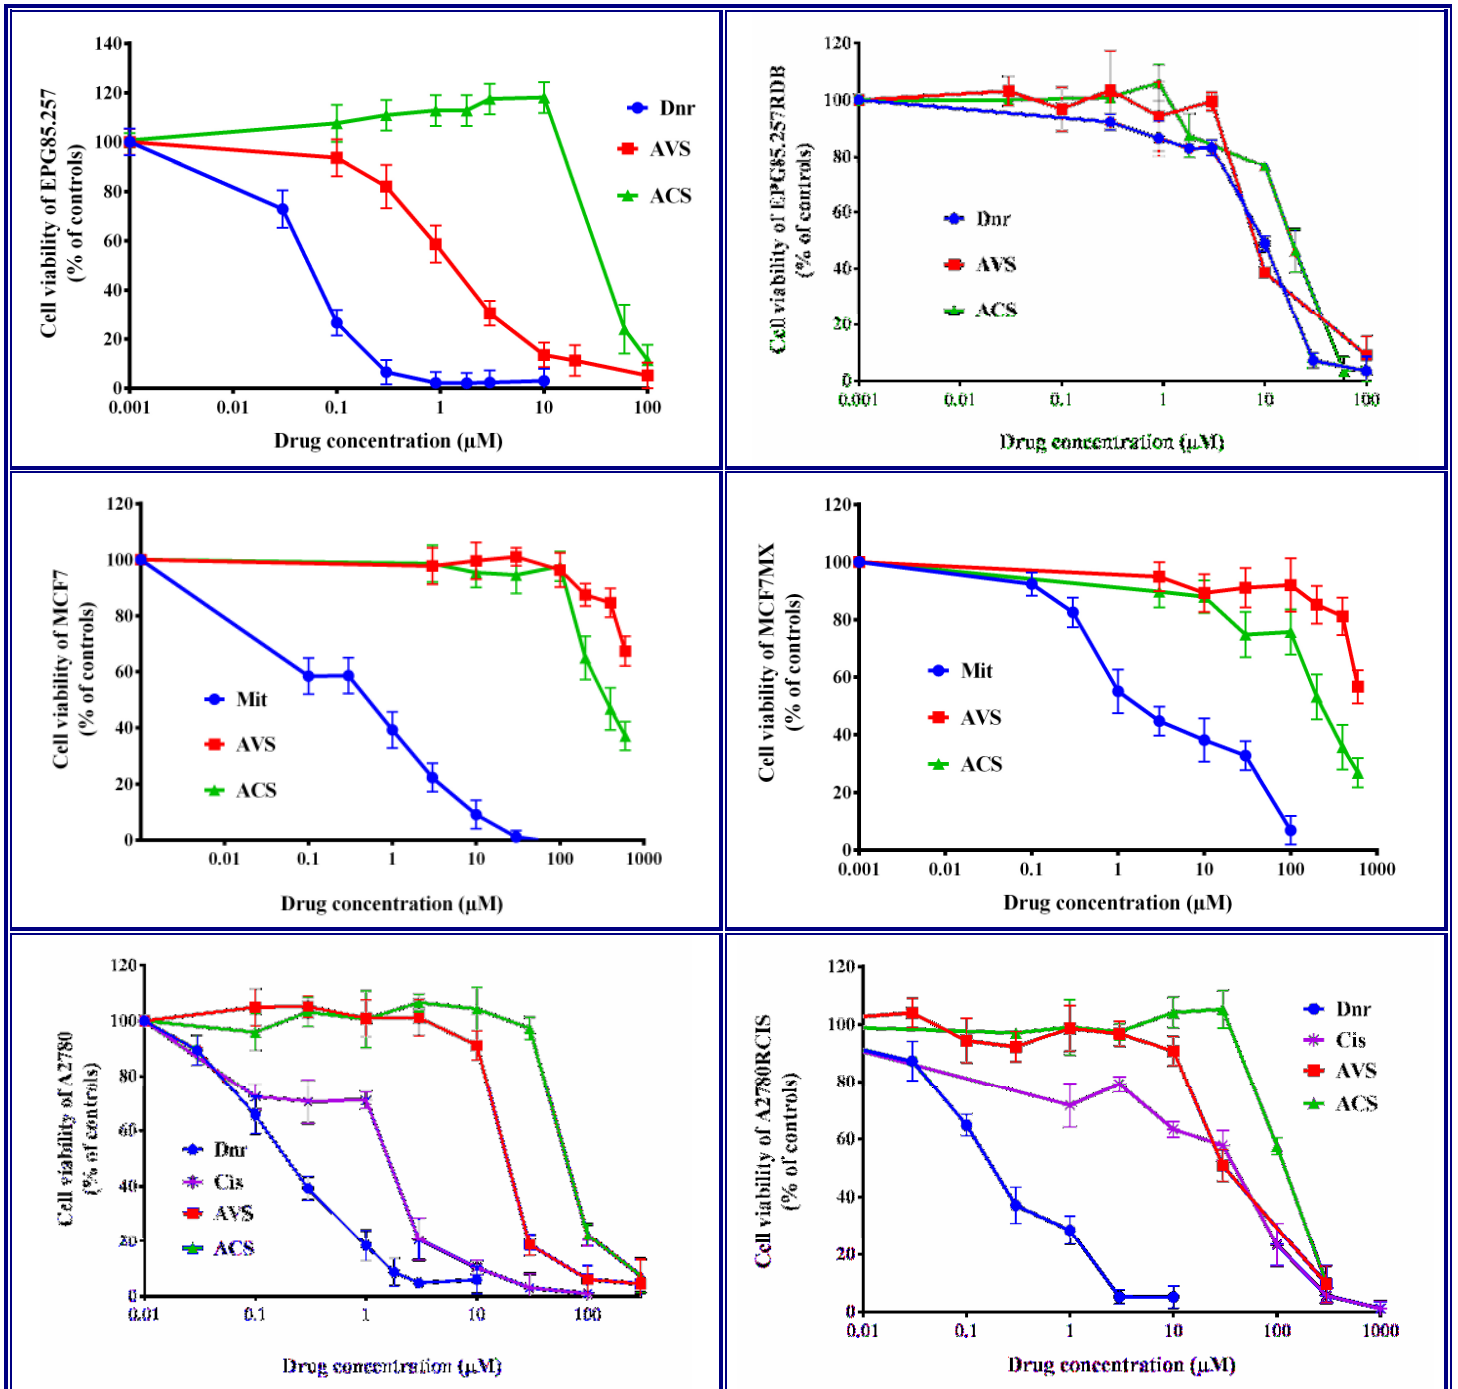

Supplementary Figure S1. Cytotoxic effects of cisplatin, daunorubicin, mitoxantrone, acetylshikonin (ACS), and acetoxyisovalerylshikonin (AVS). Cells were cultured for 5 days with different doses of the agents. Cell viability was evaluated by MTT. The values represent the means of three independent experiments performed in pentaplicate (mean  $\pm$  SE).

Scientific Reports  
Supplementary Dataset

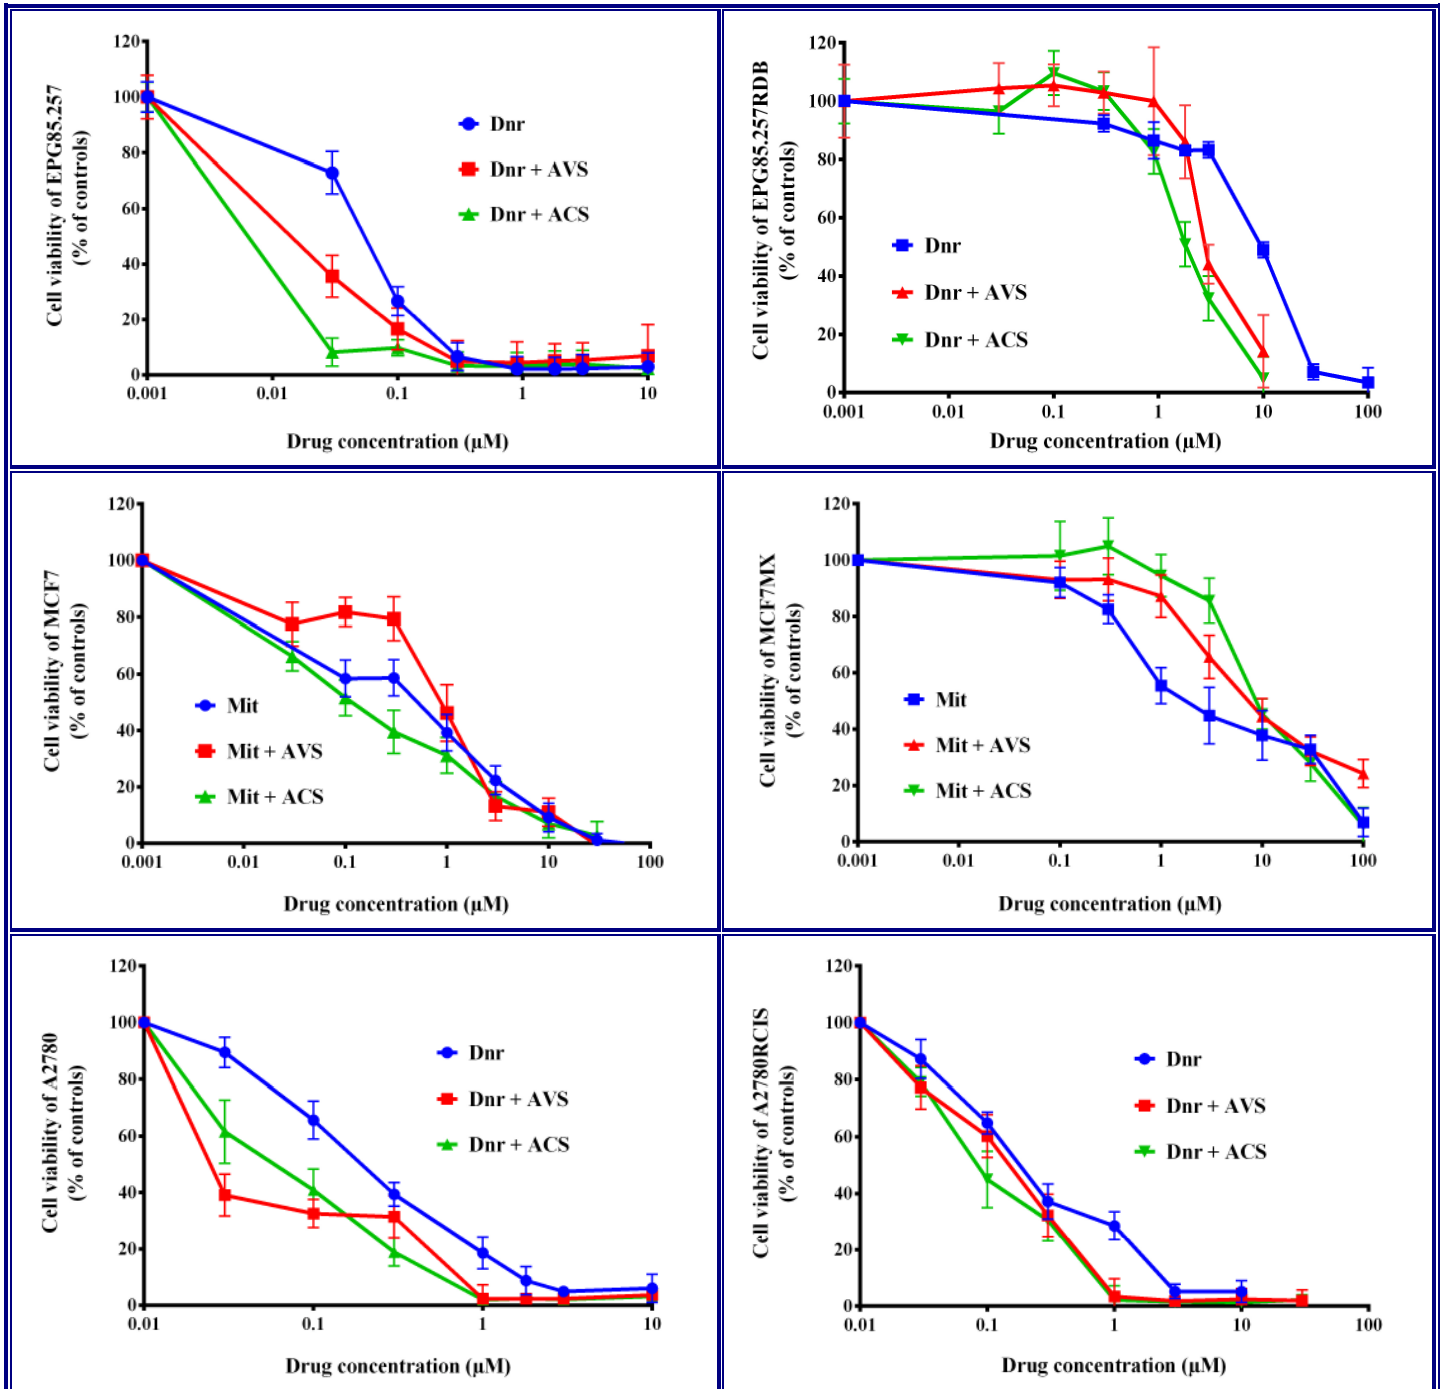

Scientific Reports  
Supplementary Dataset

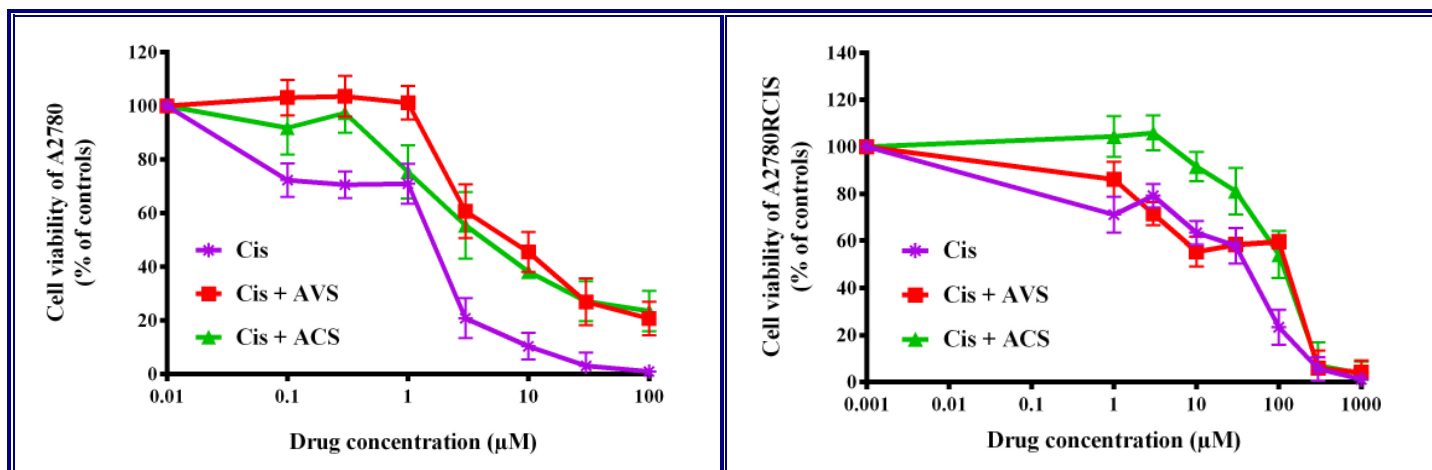

Supplementary Figure S2. Cytotoxicity of cisplatin, daunorubicin, and mitoxantrone either with acetylshikonin (ACS) or acetoxyisovalerylshikonin (AVS). Cells were cultured for 5 days with increasing doses of any chemotherapeutic agents in the presence ( $IC_{10}$  values) of each shikonin derivative. The values represent the means of three independent experiments performed in pentaplicate (mean  $\pm$  SE).

Scientific Reports  
Supplementary Dataset

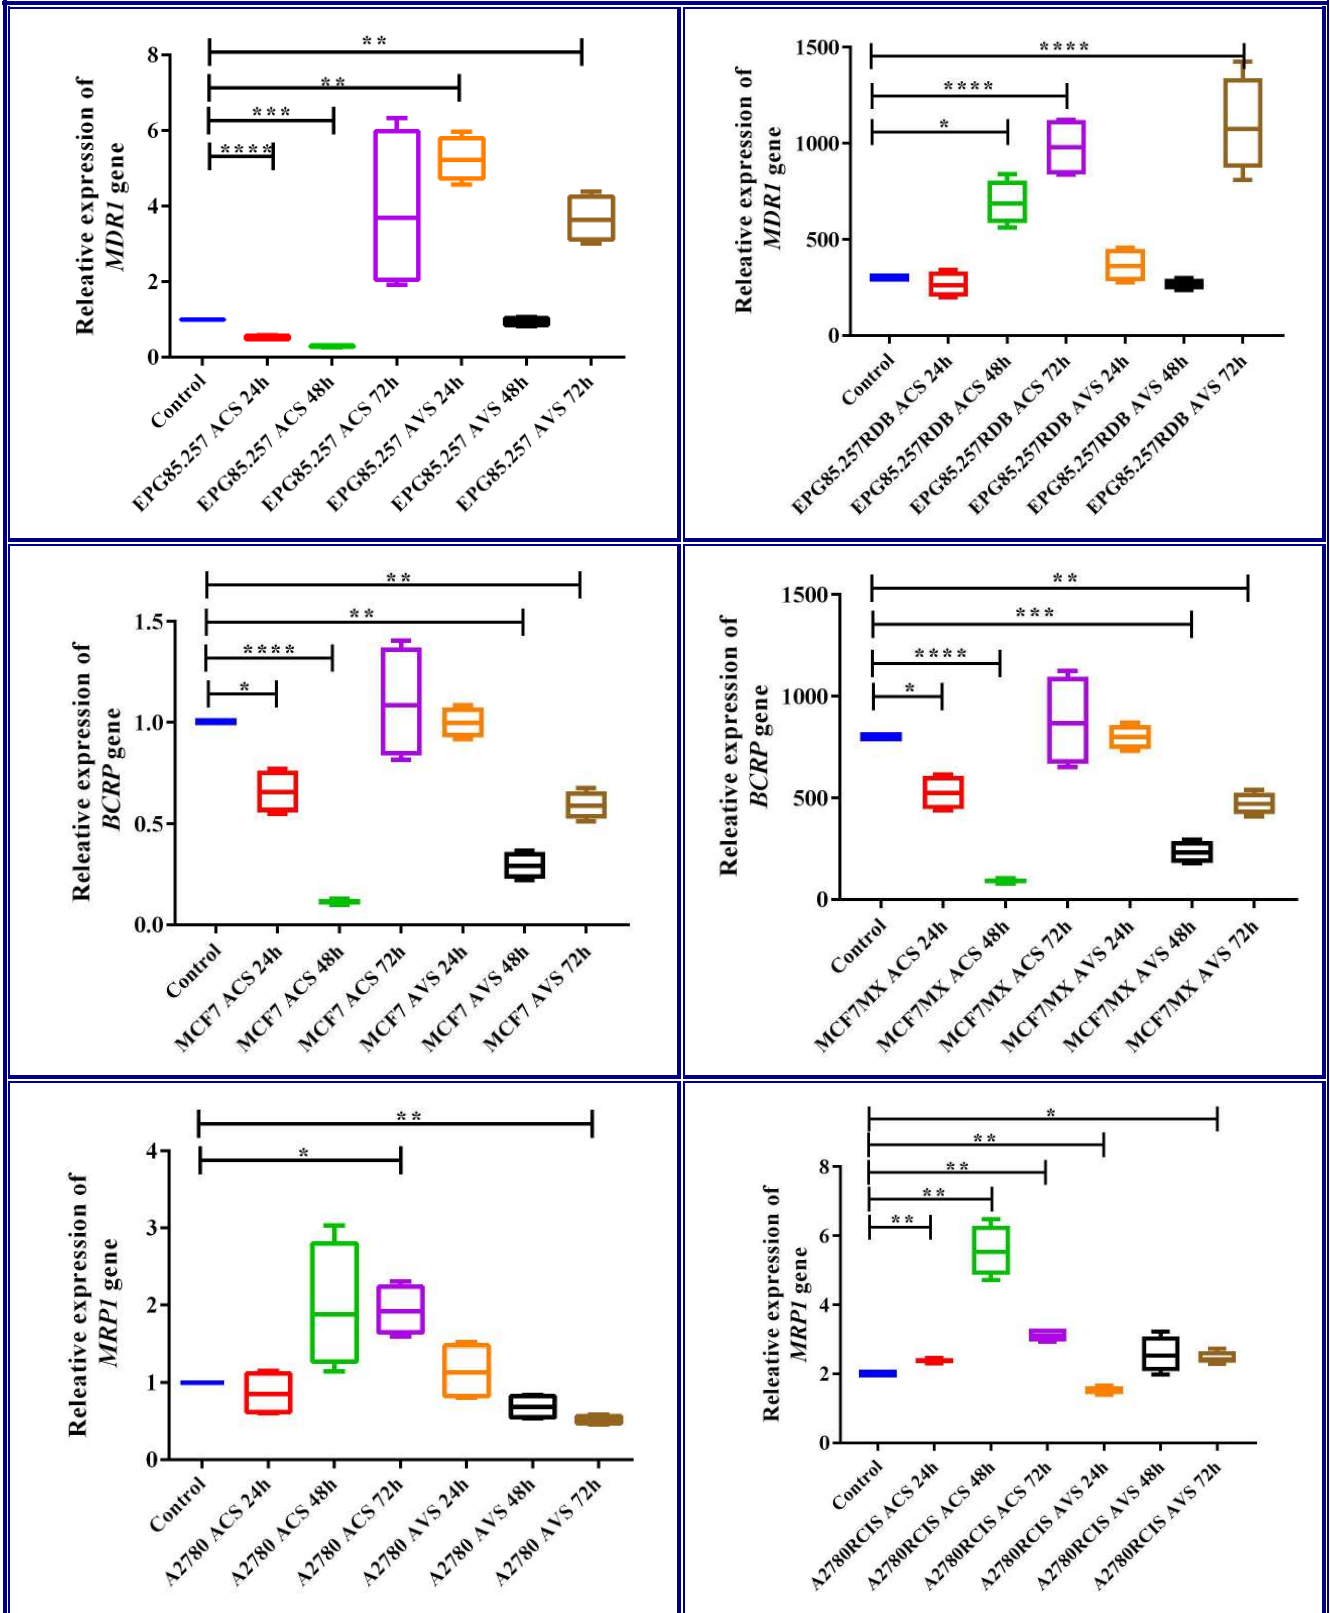

Scientific Reports  
Supplementary Dataset

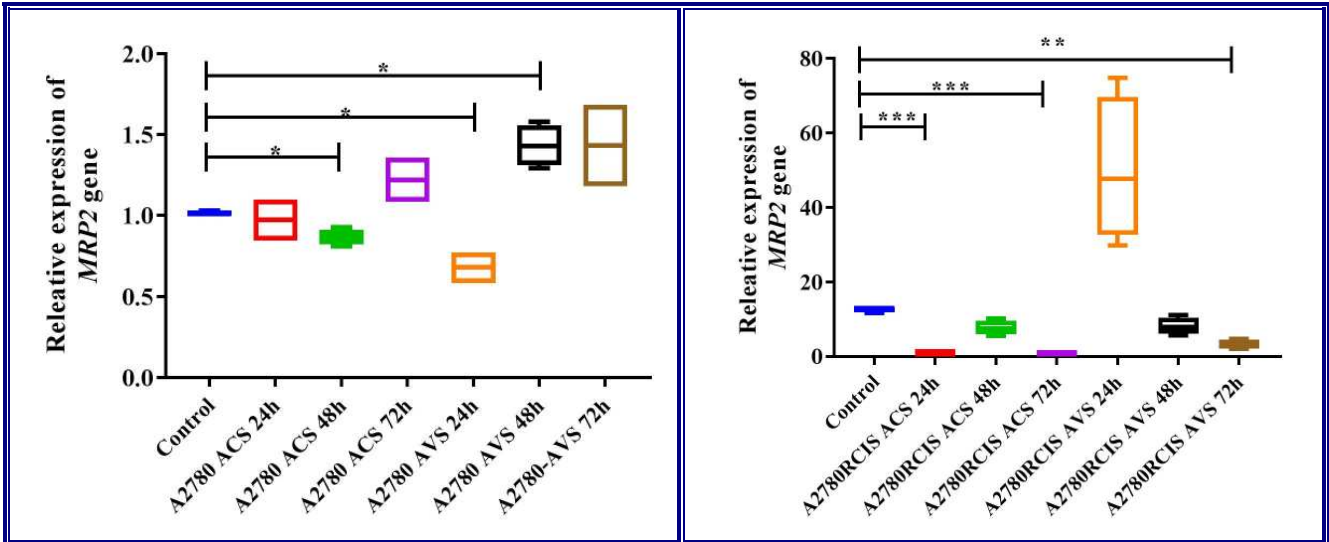

Supplementary Fig. S3. Real-time PCR based quantification of *MDR1*, *BCRP*, *MRP1*, and *MRP2* transcripts in EPG85.257RDB, MCF7MX, A2780RCIS and their parental counterparts. Cells were incubated with  $IC_{10}$  concentrations of any oxygenated shikonins for 24 h, 48 h, and 72 h. Transcripts levels were measured using the Pfaffl method. The results are reported as mean  $\pm$  SE of three independent experiments in triplicate. Symbols (\*\*\*\*), (\*\*\*), (\*\*), and (\*) represent the mean differences between parental and resistant cell transcriptions as  $P < 0.0001$ ,  $P < 0.001$ ,  $P < 0.01$ , and  $P < 0.05$  using one-way ANOVA, respectively. ACS, acetylshikonin; AVS, acetoxisovalerylshikonin.

Scientific Reports  
Supplementary Dataset

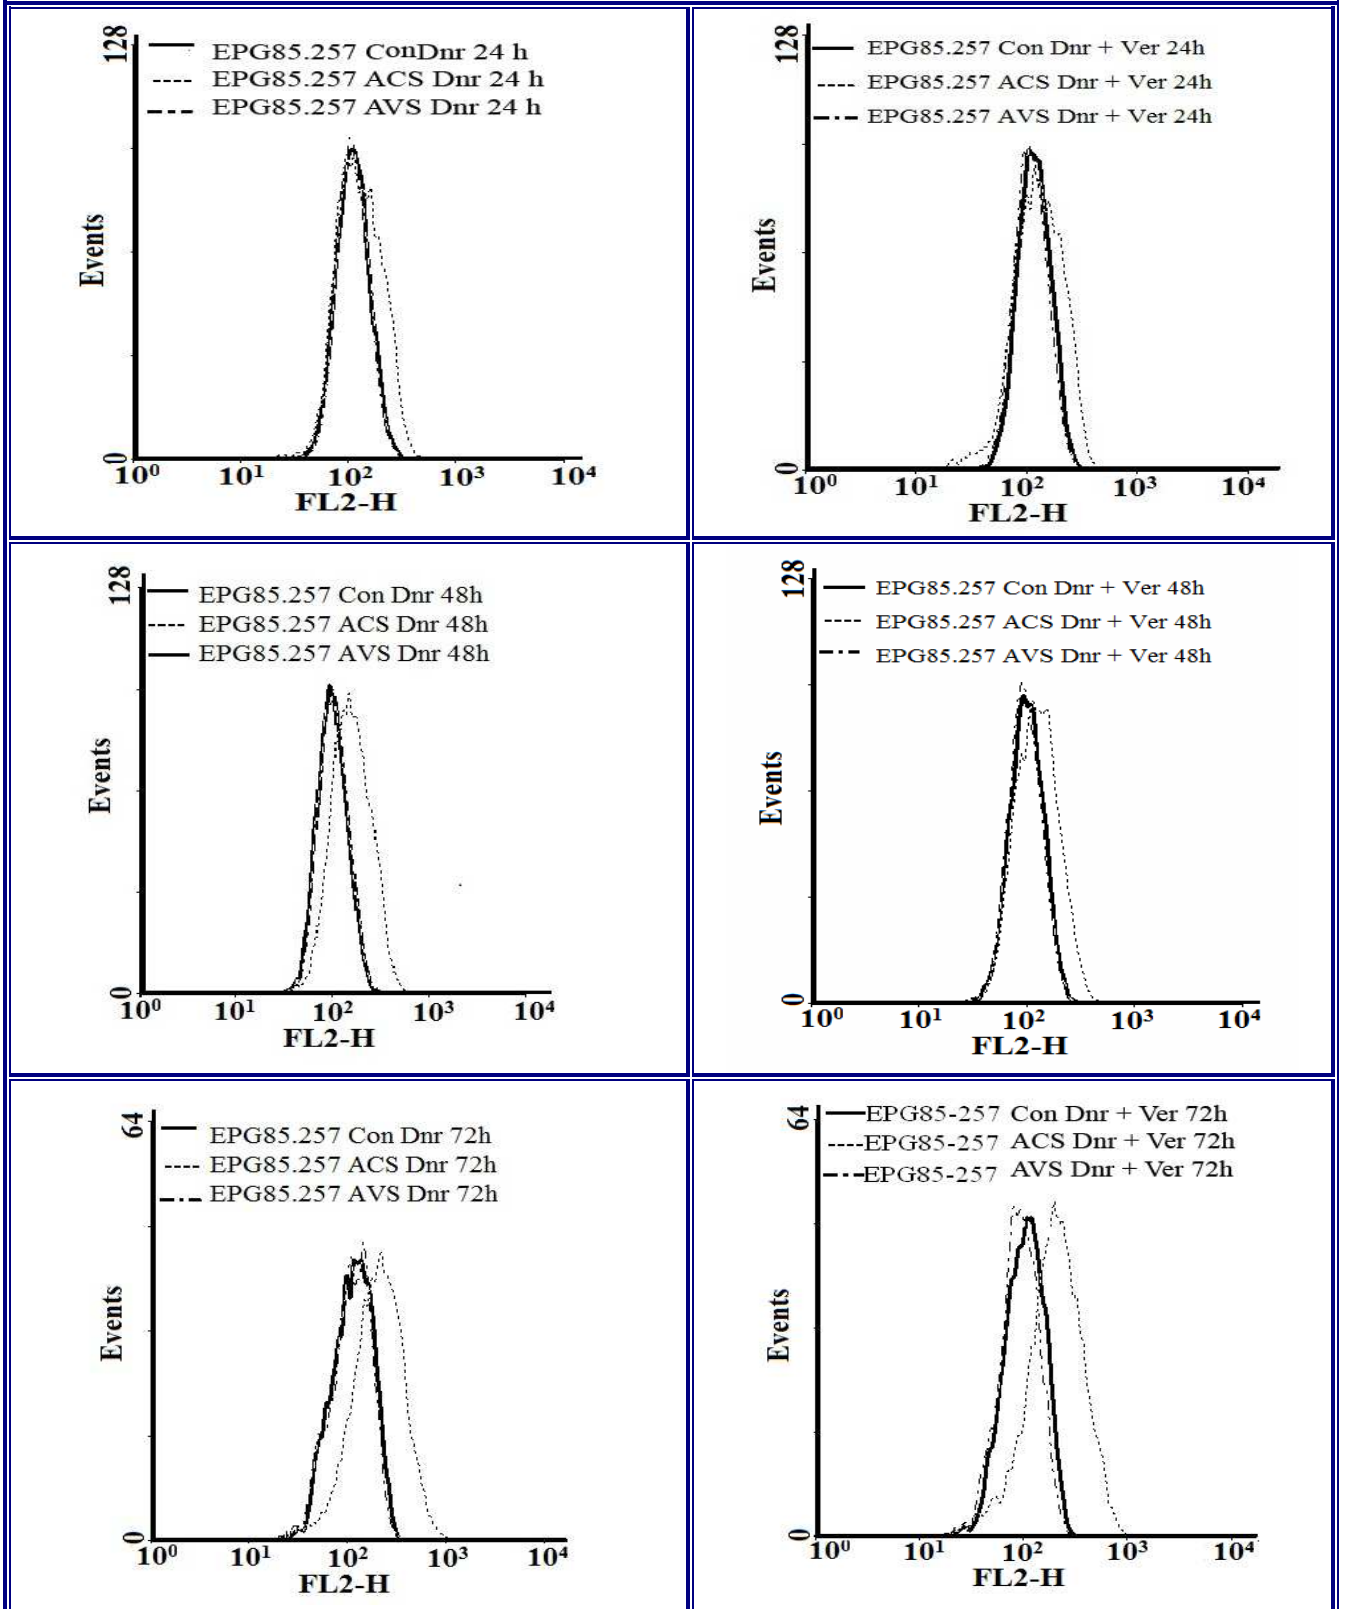



Scientific Reports  
Supplementary Dataset

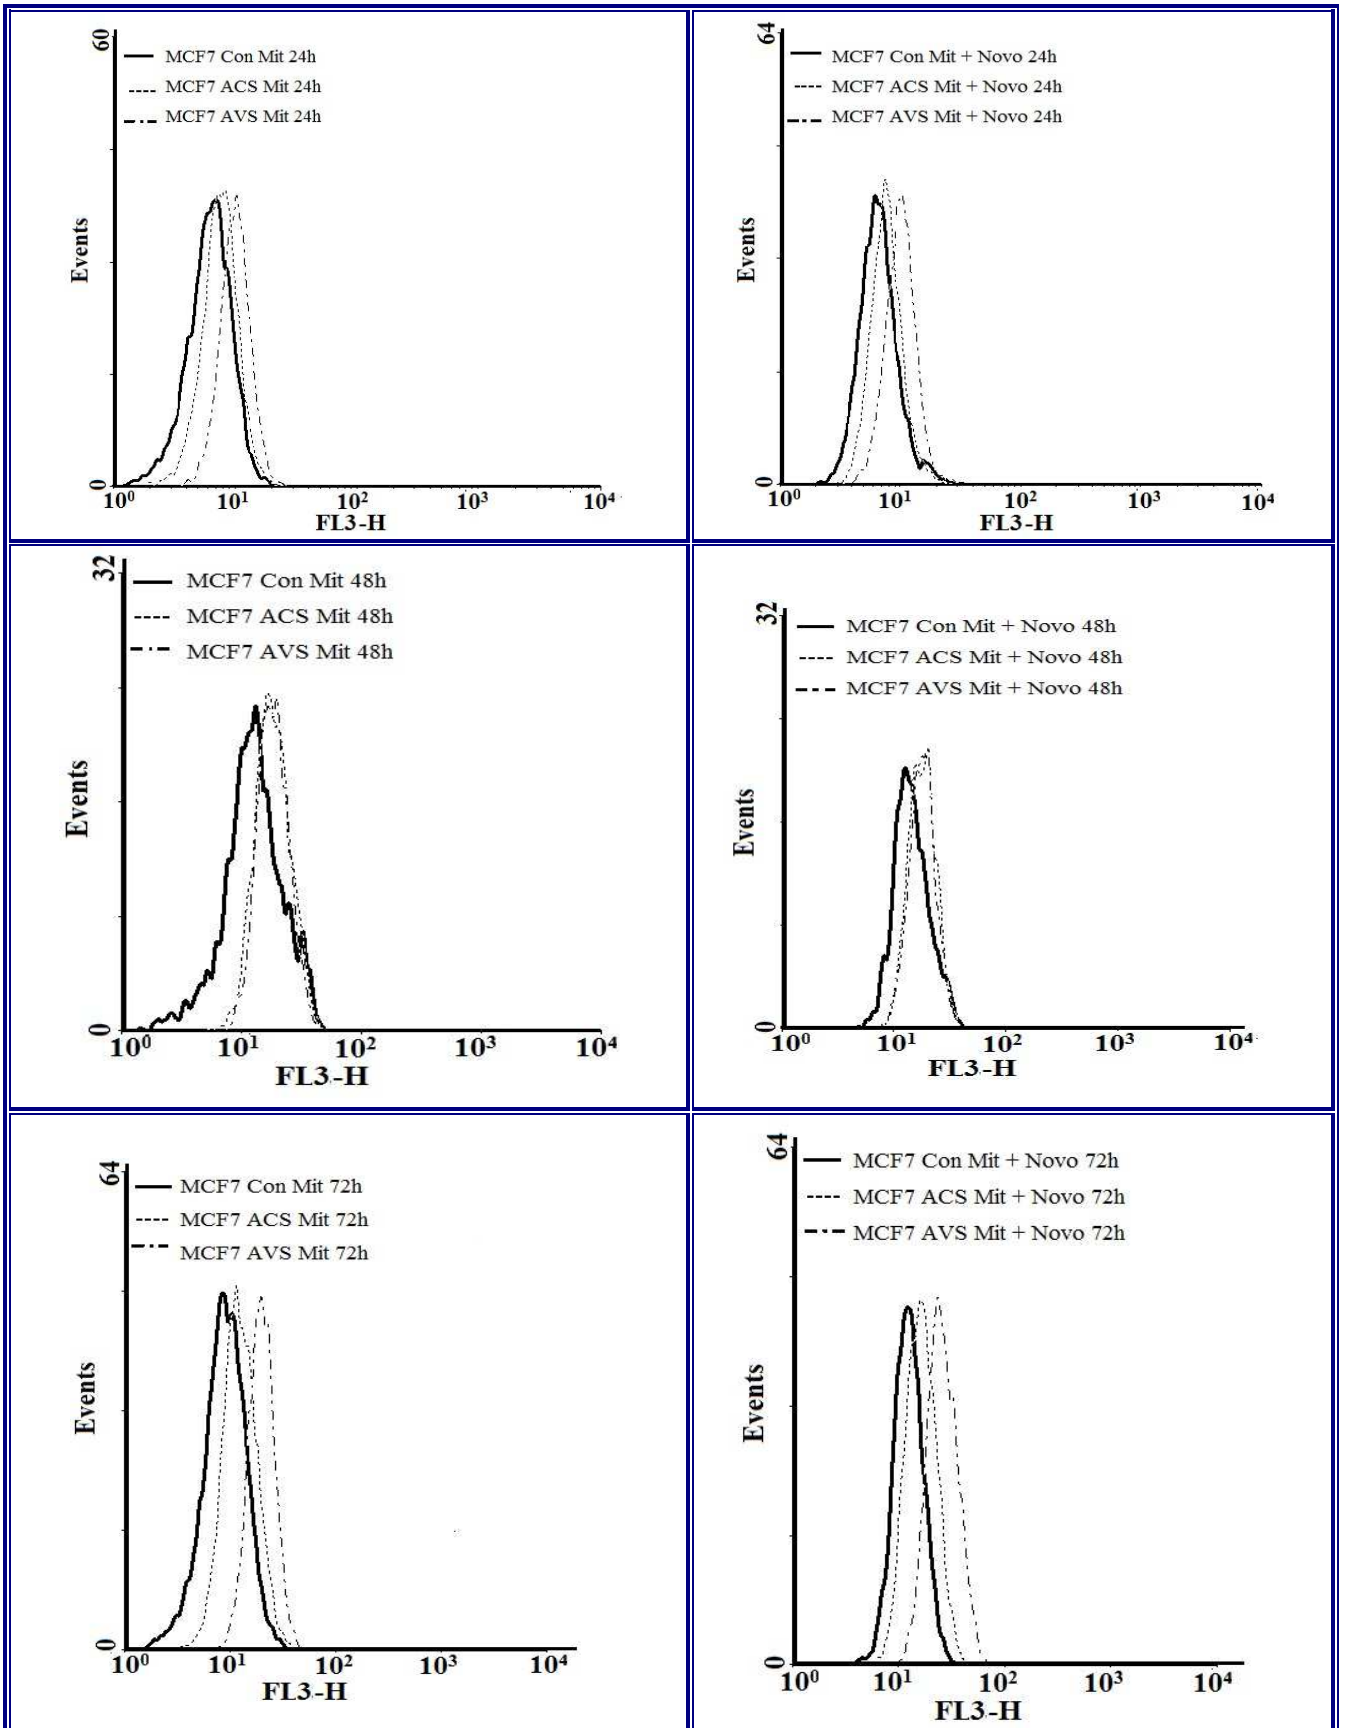

Scientific Reports  
Supplementary Dataset

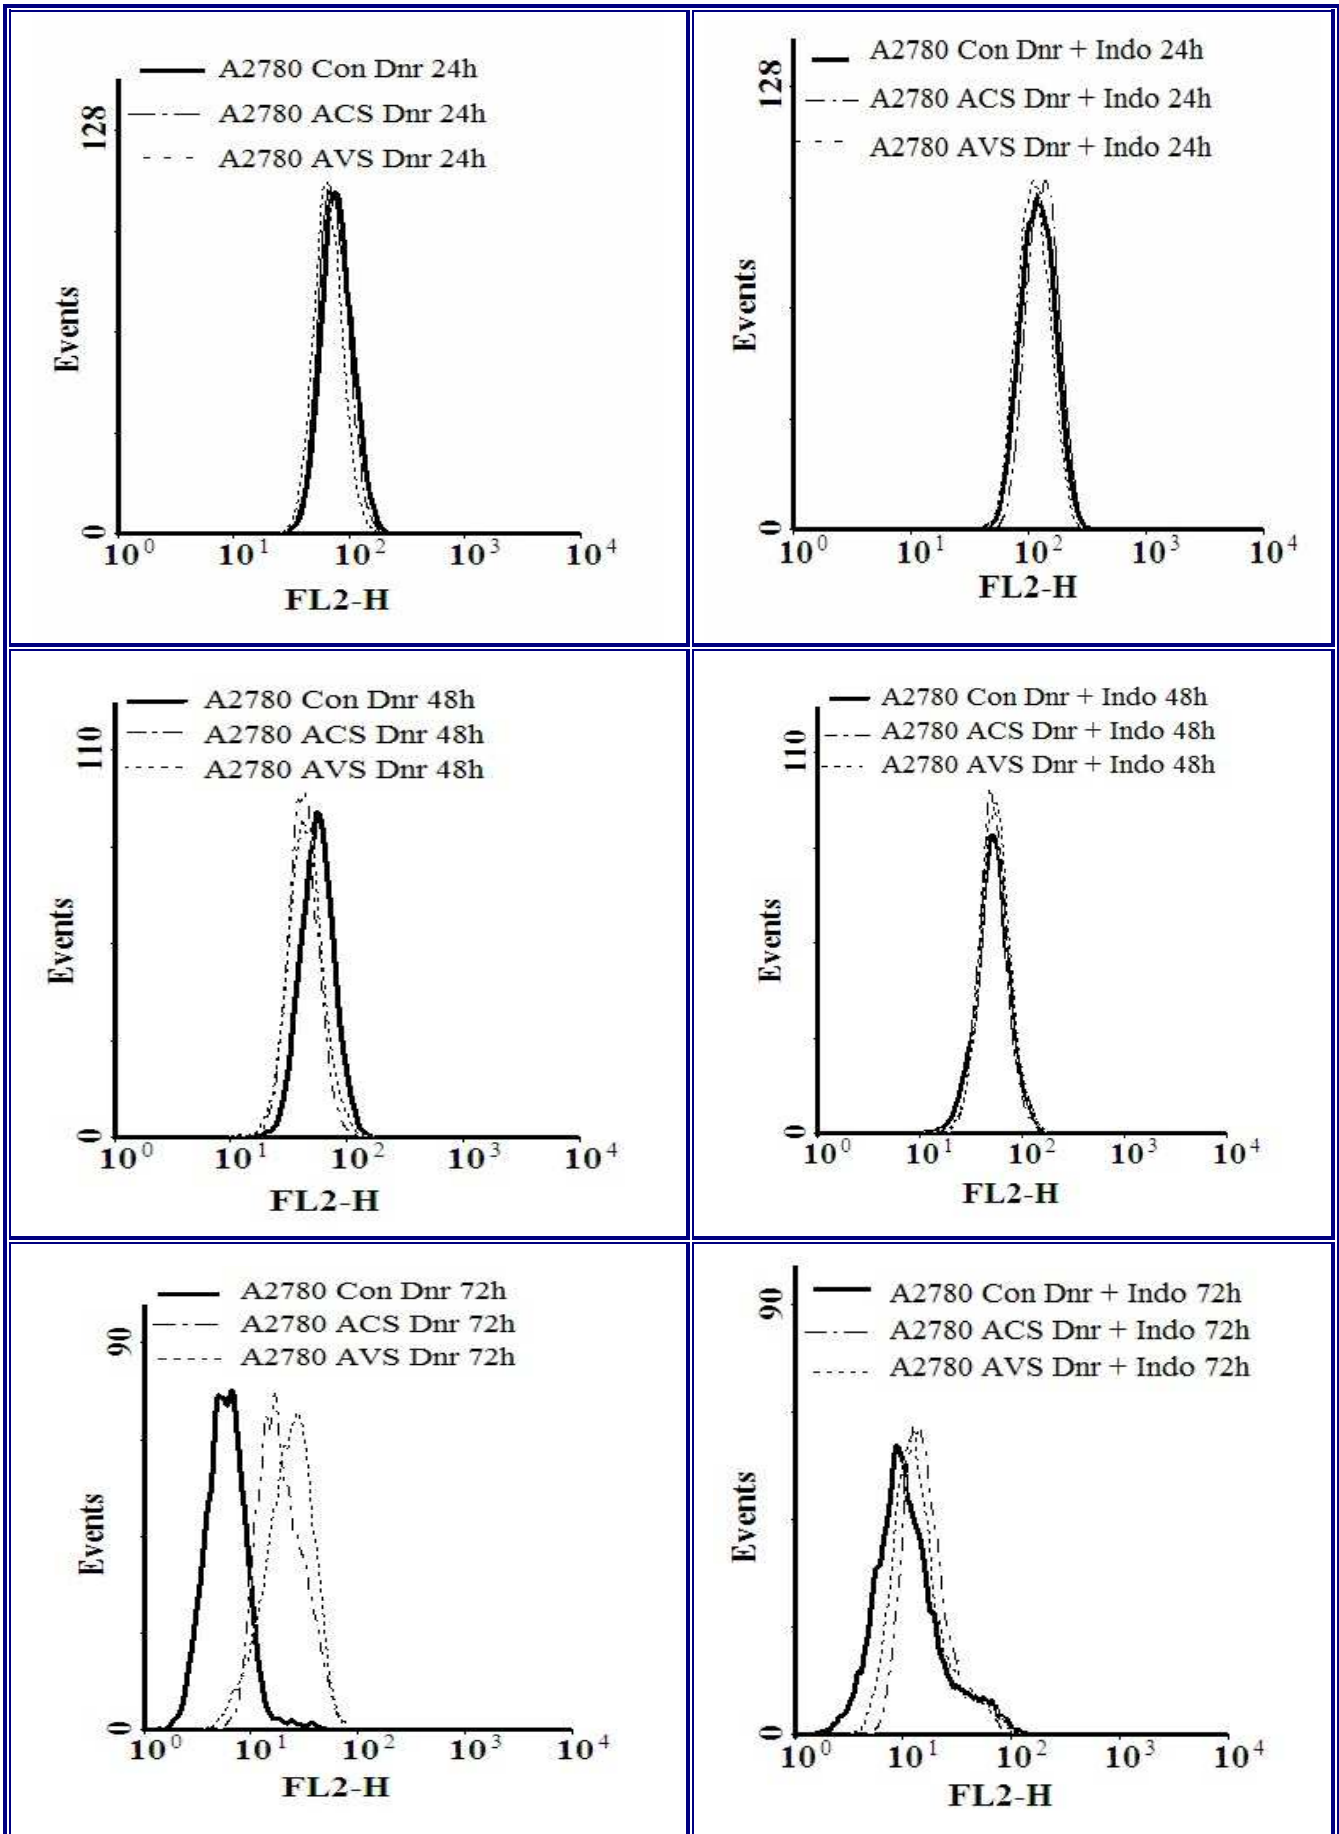

**Scientific Reports**  
**Supplementary Dataset**

**Supplementary Figure S4.** Analyses of shikonin effects on daunorubicin and mitoxantrone efflux from EPG85.257, MCF7, and A2780 parent cells in the absence or presence of specific inhibitors (verapamil, novobiocin, or indomethacin). No drug (autofluorescence; solid line), fluorescence levels after 60 min of efflux in the presence of acetoxyisovalerylshikonin (dashed line) or acetylshikonin (dotted line). Con, control; AVS, acetoxyisovaleryl-shikonin; ACS, acetylshikonin; Dnr, daunorubicin; Indo, indomethacin; Mit, mitoxantrone; Novo, novobiocin; Ver, verapamil.

Scientific Reports  
Supplementary Dataset

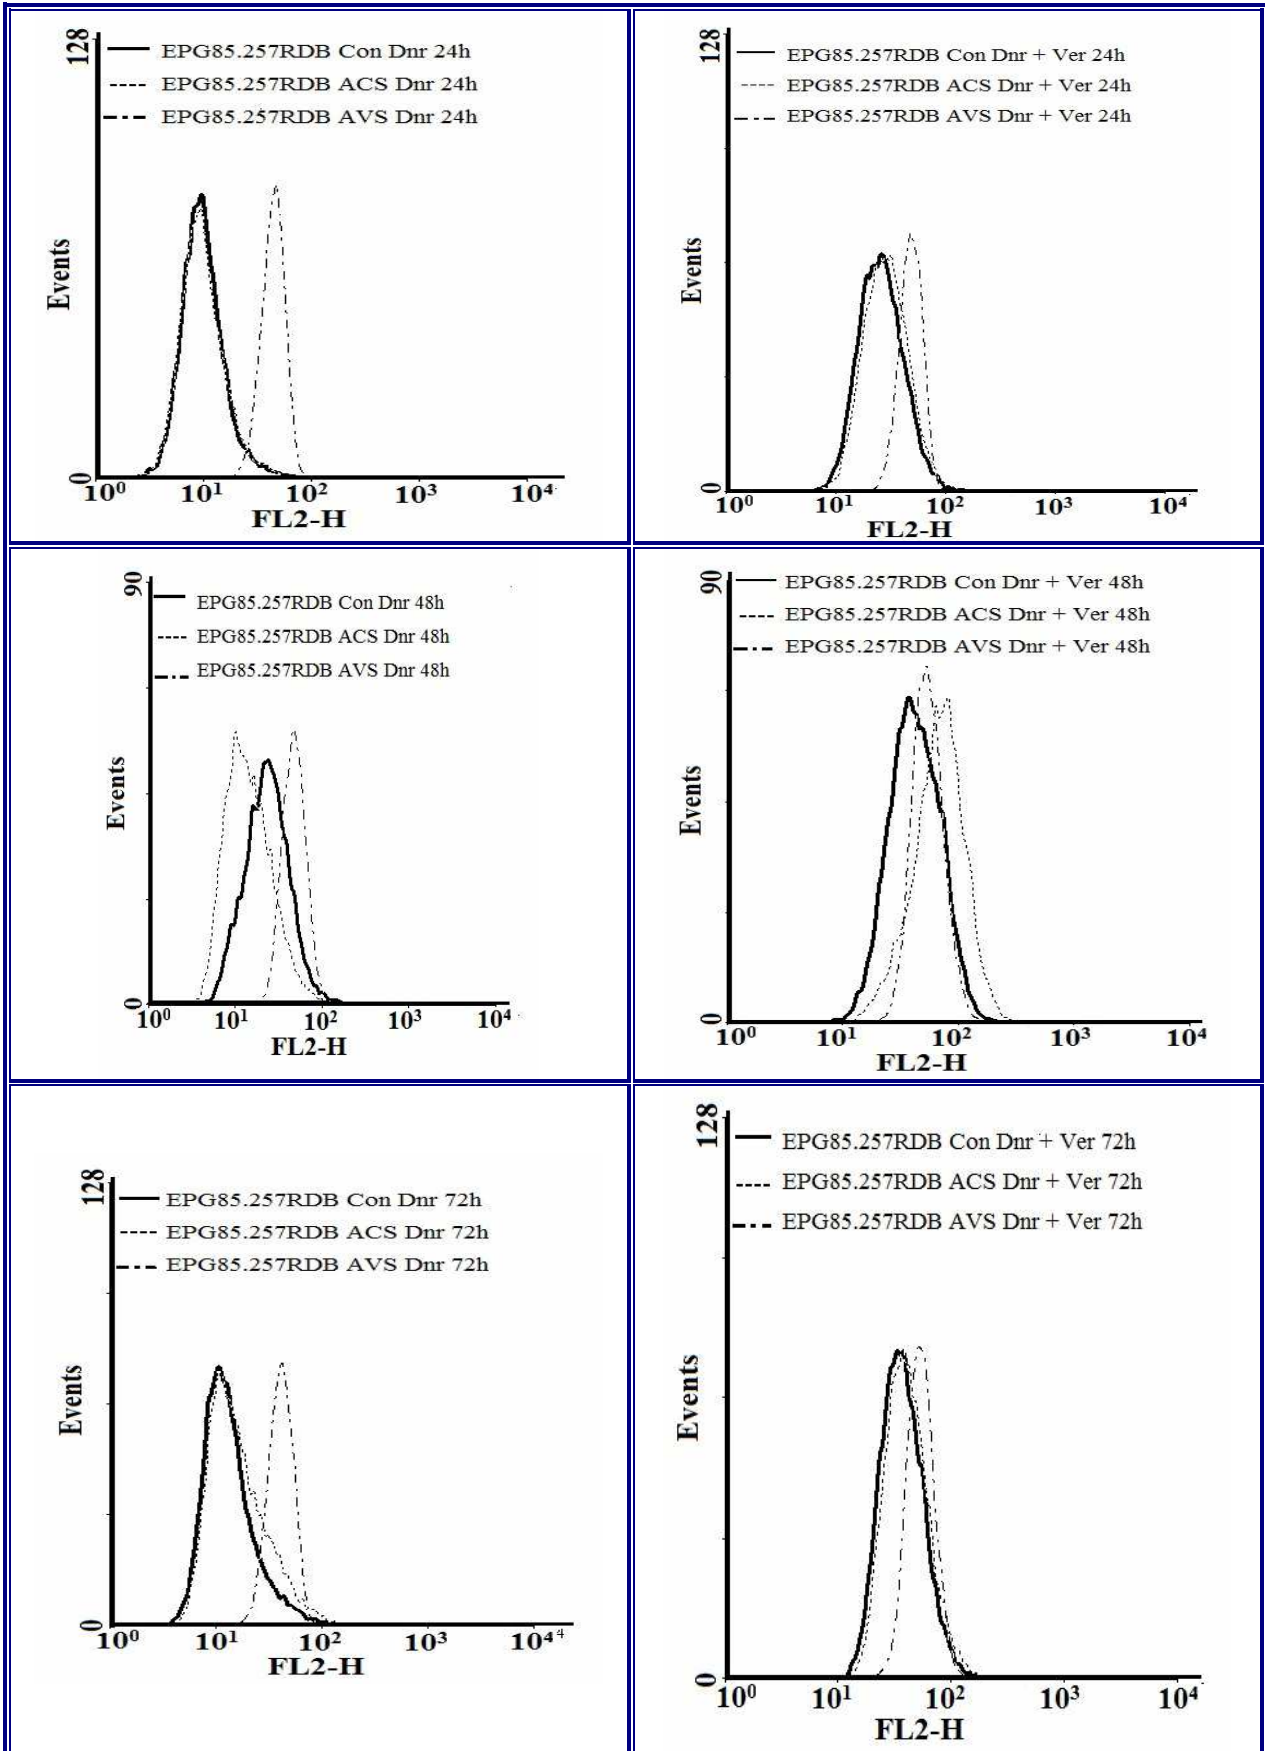

Scientific Reports  
Supplementary Dataset

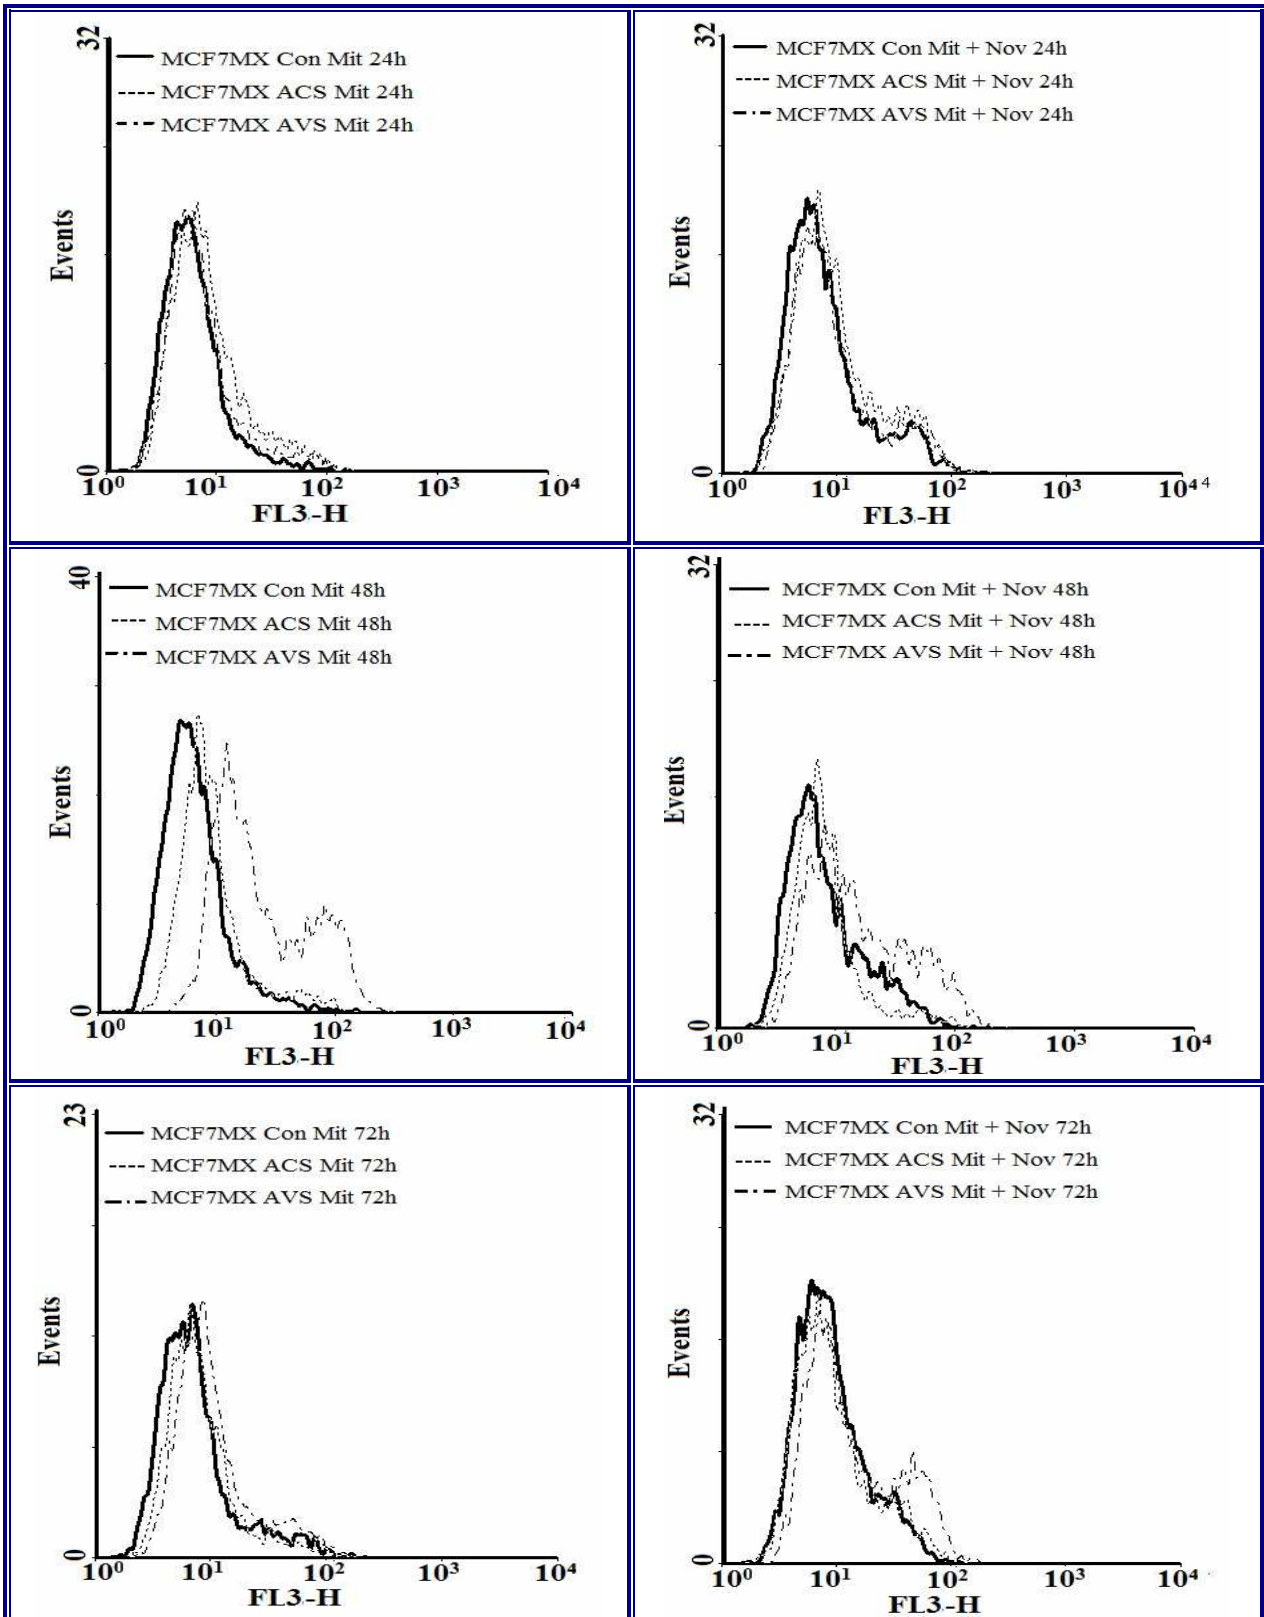

Scientific Reports  
Supplementary Dataset

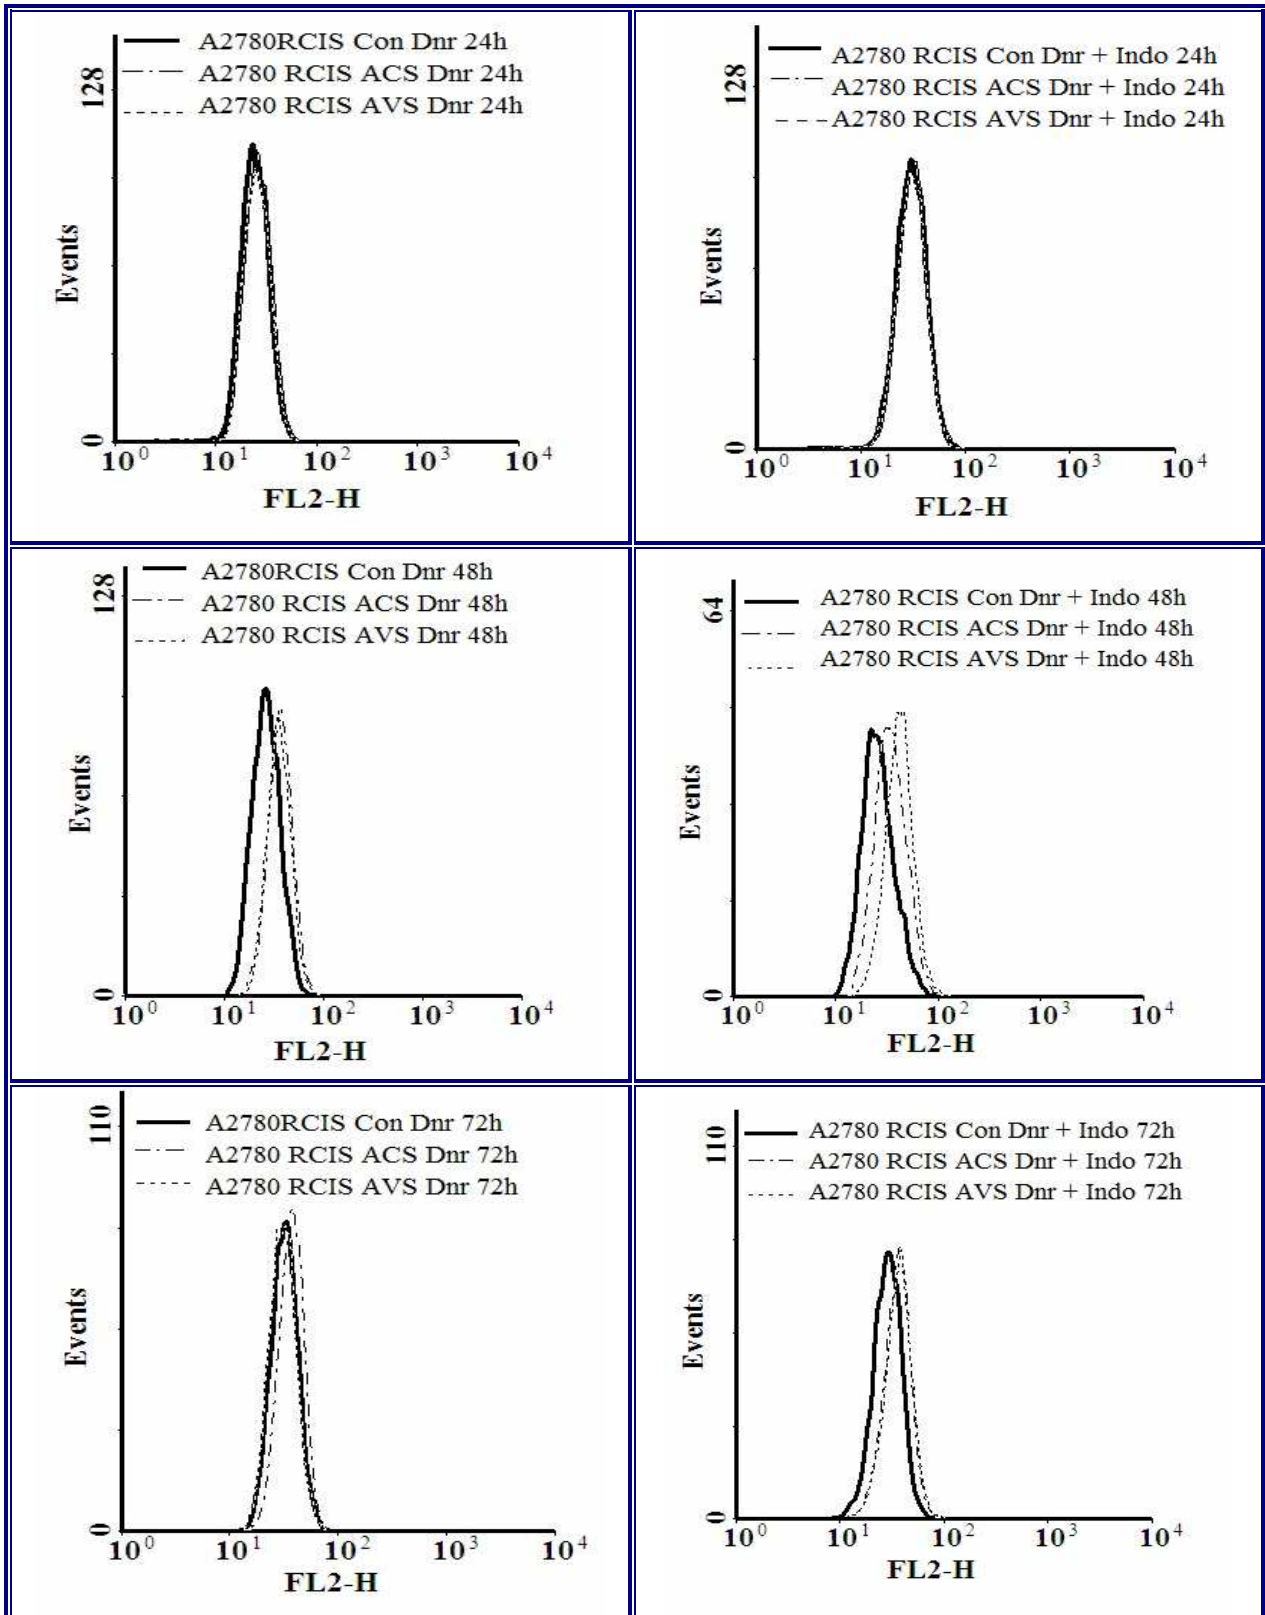

**Supplementary Figure S5.** Efflux analyses of shikonin derivatives on daunorubicin and mitoxantrone from EPG85.257RDB, MCF7MX, and A2780RCIS resistant cells in the absence or presence of specific inhibitors (verapamil, novobiocin, or

**Scientific Reports**  
**Supplementary Dataset**

indomethacin). No drug (autofluorescence; solid line), fluorescence levels after 60 min of efflux in the presence of acetoxyisovalerylshikonin (dashed line) or acetylshikonin (dotted line). Right-shifted fluorescence peaks represent efflux inhibition. Con, control; AVS, acetoxyisovaleryl-shikonin; ACS, acetylshikonin; Dnr, daunorubicin; Indo, indomethacin; Mit, mitoxantrone; Novo, novobiocin; Ver, verapamil.

Scientific Reports  
Supplementary Dataset

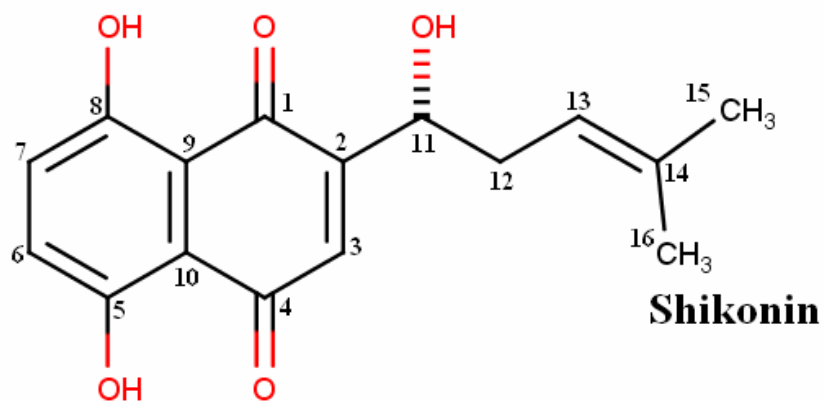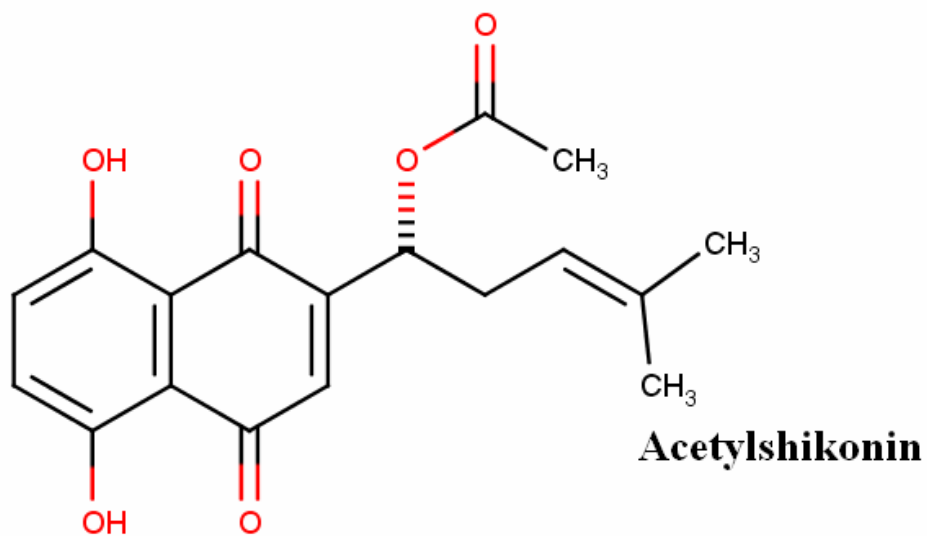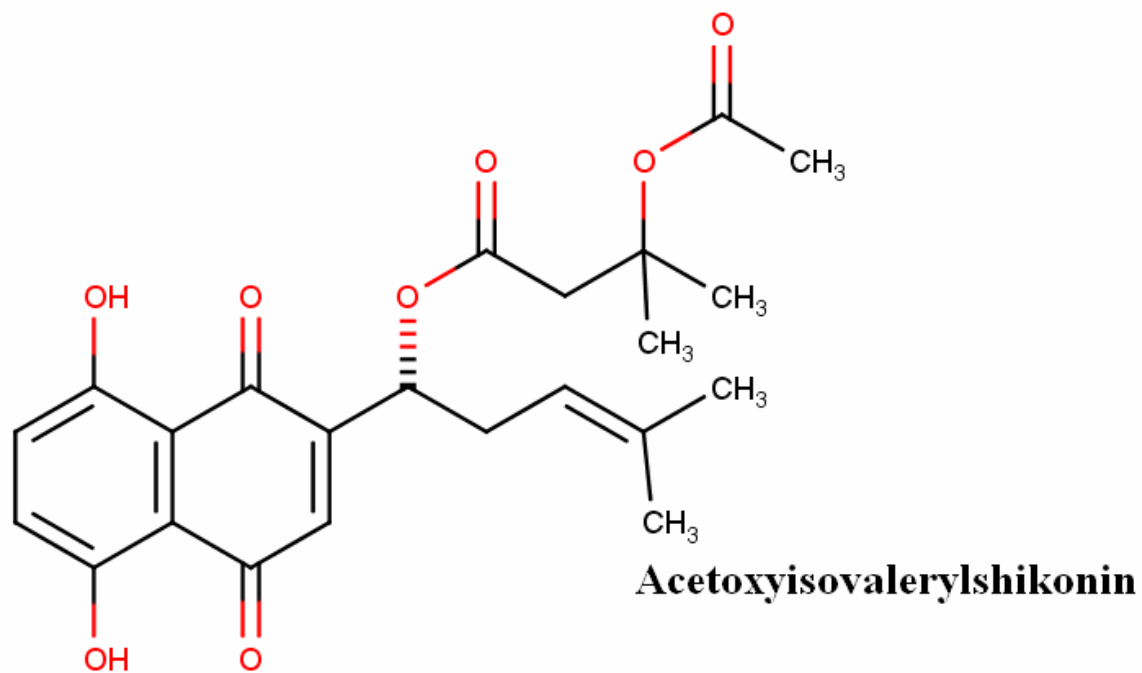

Supplementary figure S6. Chemical structures of shikonin, acetylshikonin, and acetoxyisovalerylshikonin.
